# Supplementary material for: Mechanism of SARS-CoV-2 polymerase stalling by remdesivir
Source: Springer Nature journal article supplement (doi:10.1038/s41467-020-20542-0), 2021-01-12
Supplement: MOESM2 [file 41467_2020_20542_MOESM2_ESM.pdf]

## Peer Review Information

**Editorial Note:** This manuscript has been previously reviewed at another journal that is not operating a transparent peer review scheme. The manuscript was considered suitable for publication without further review at *Nature Communications*.
